# Supplementary material
Source: PubMed Central journal article supplement (PMC2823638)
Supplement: 2009.28750_1.pdf [file 2009.28750_1.pdf]

Online Figure 1.

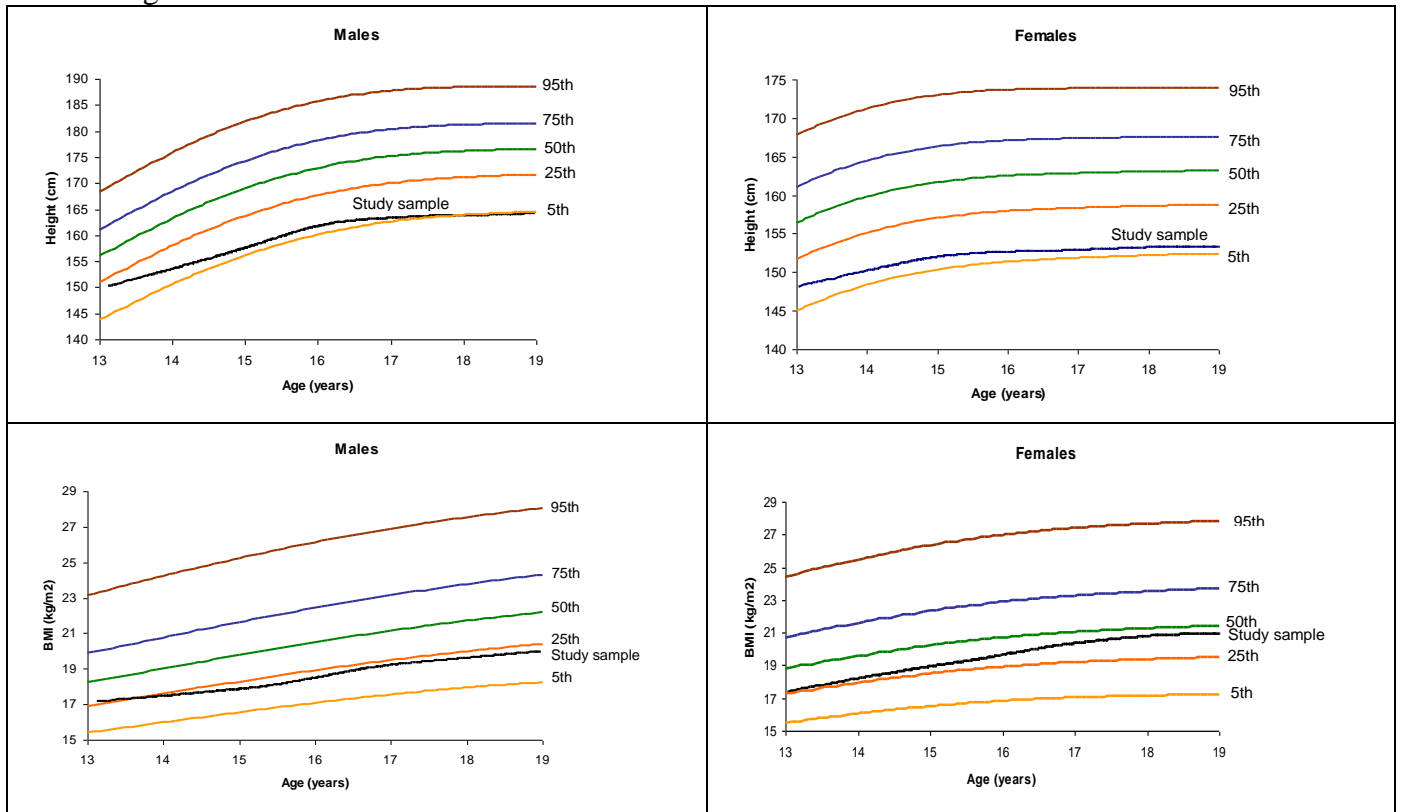

Online Figure 2.

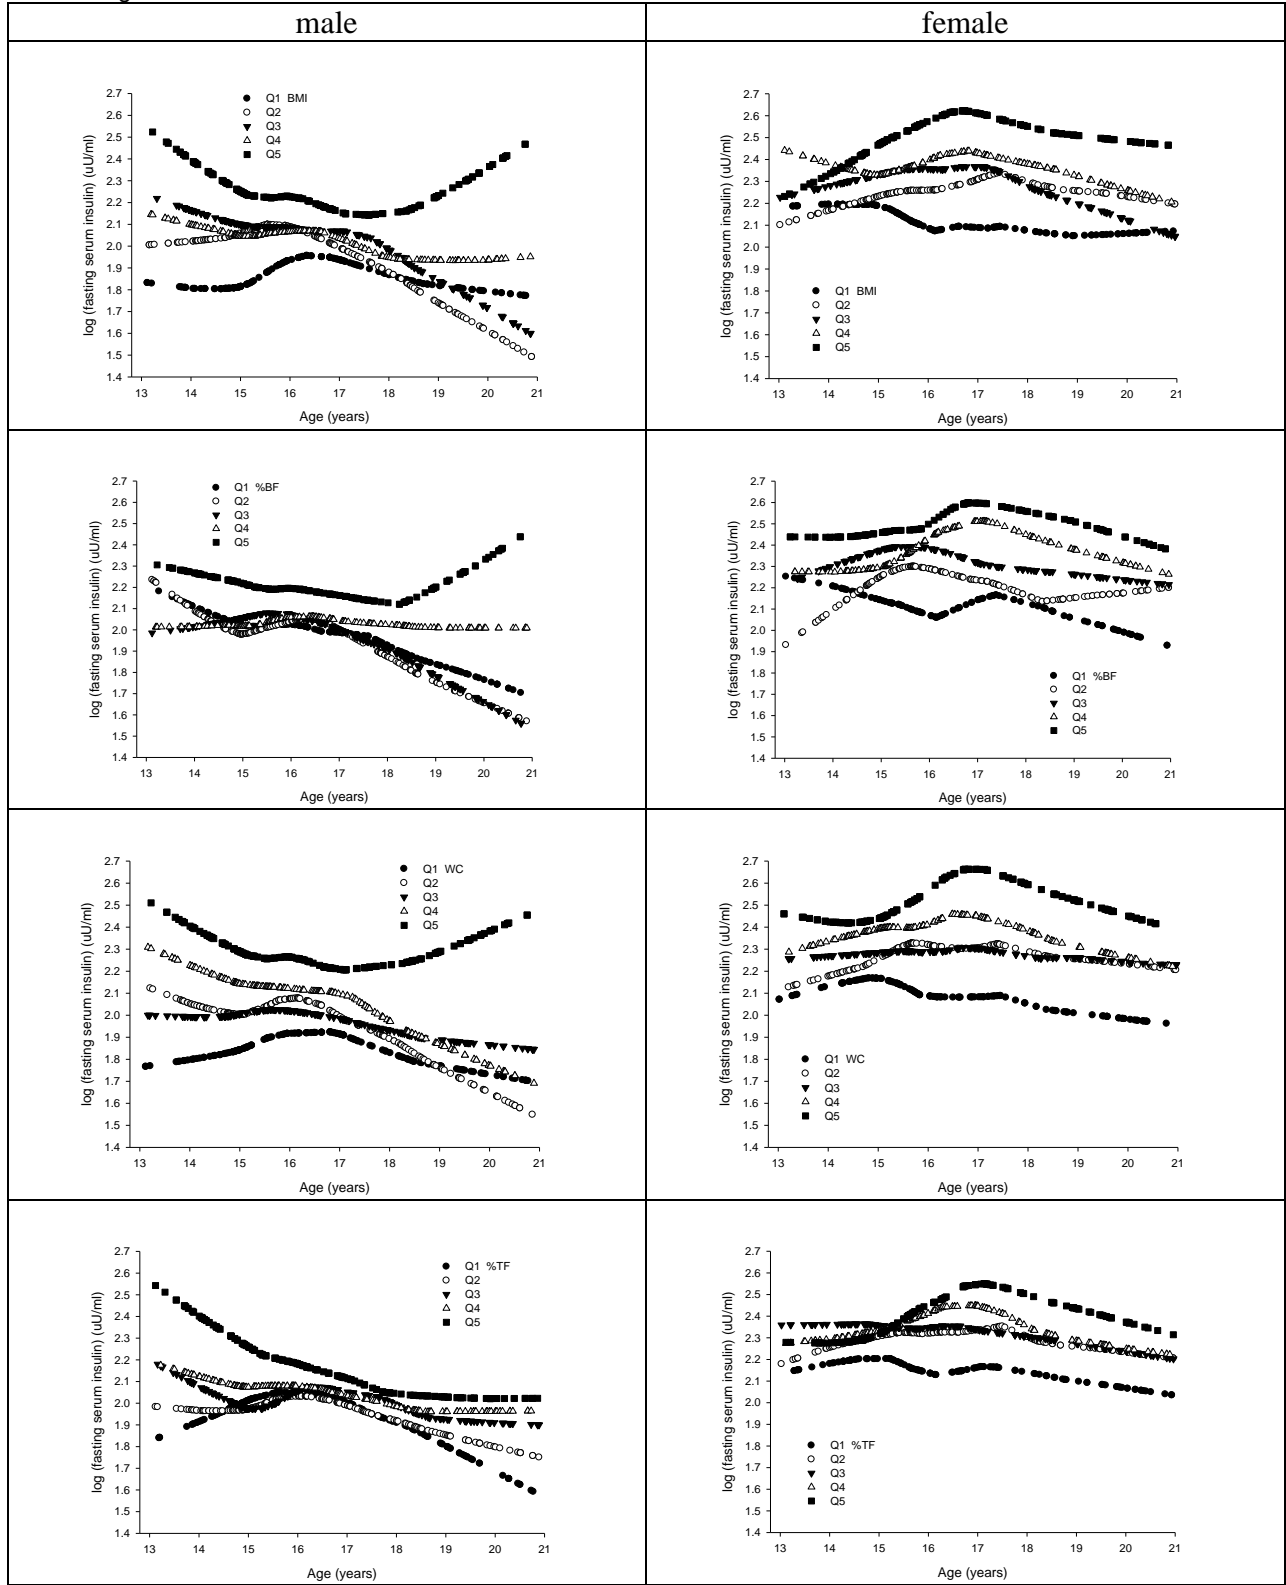

BMI: body mass index; %BF: percent body fat; WC: waist circumference; %TF: percent trunk fat

Online figure 3.

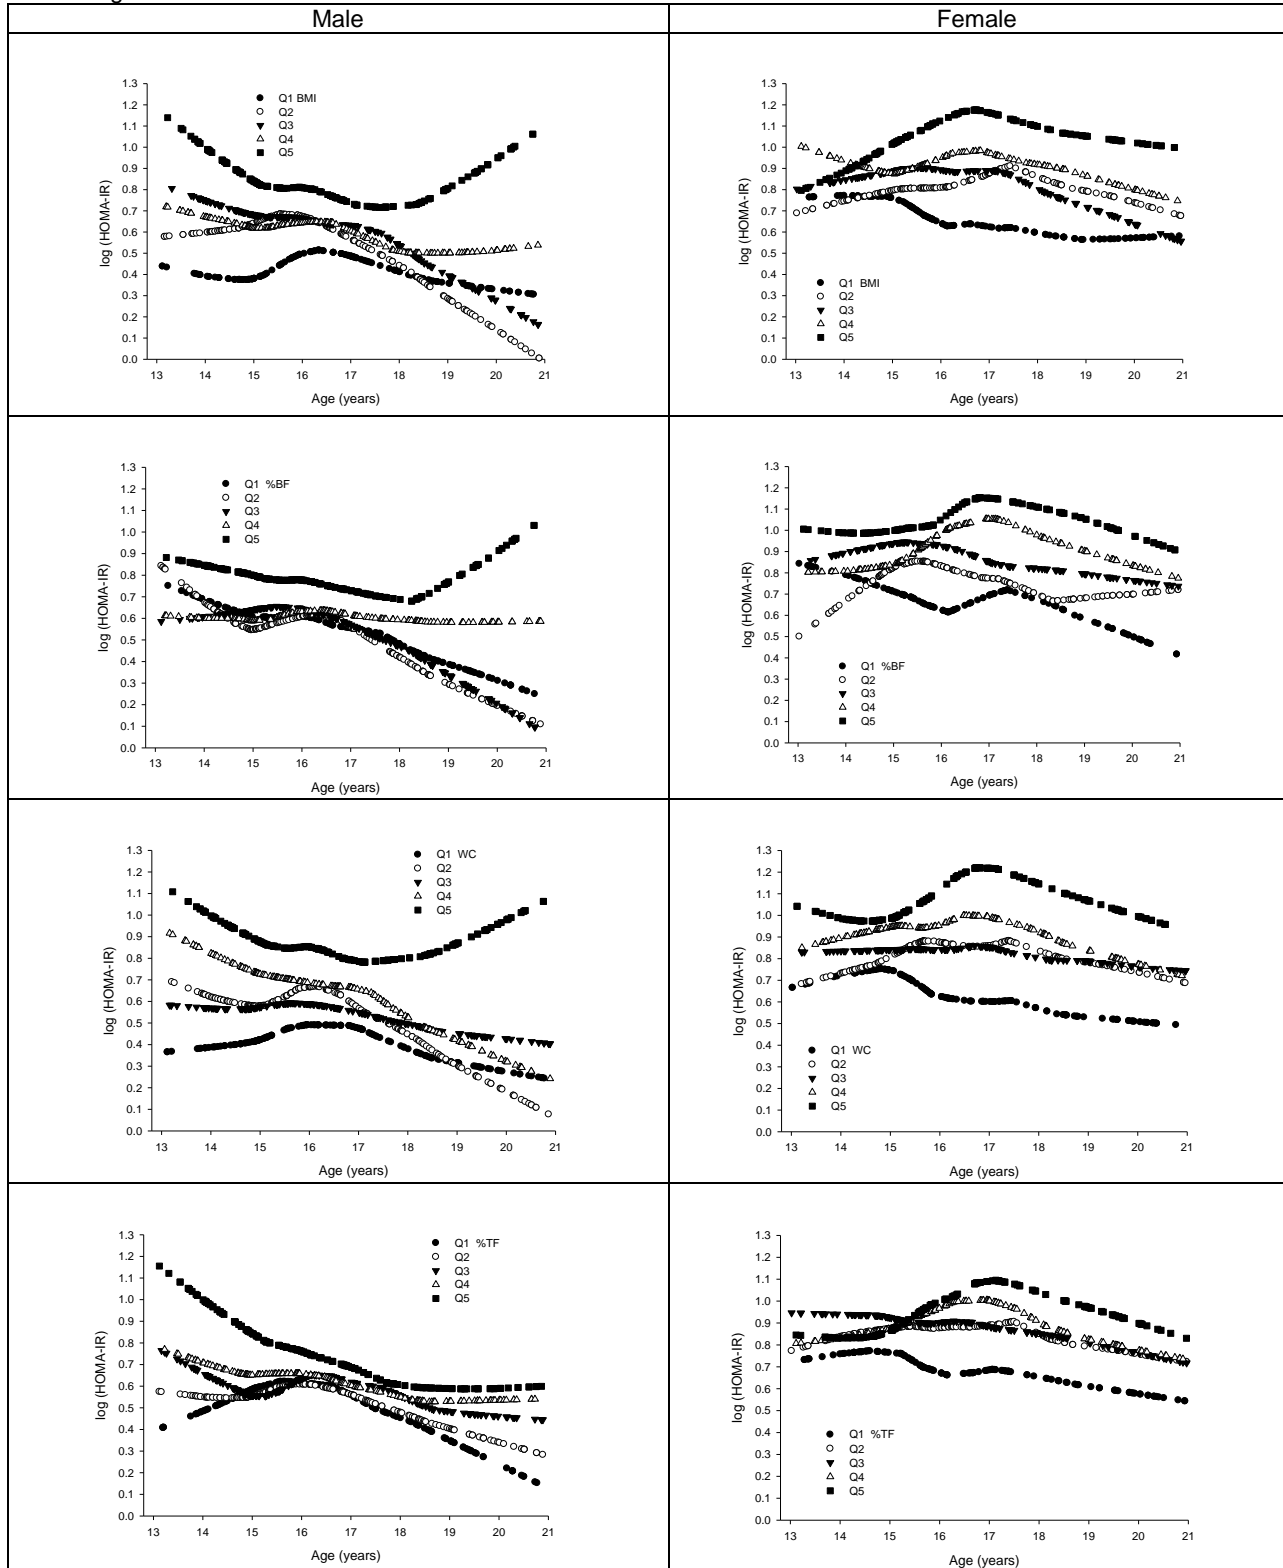

HOMA-IR: the homeostatic model assessment (HOMA) of insulin resistance (IR); BMI: body mass index; %BF: percent body fat; WC: waist circumference; %TF: percent trunk fat
